# Supplementary material for: Experts’ Opinion for Improving Pertussis Vaccination Rates in Adolescents and Adults: A Call to Action
Source: MDPI journal article supplement (doi:10.3390/ijerph19074412), 2022-04-06
Supplement: s1 [file s1]

**Table S1. Composition and brand of available dTap, DTPa-IPV and dTpa-IPV vaccines (number of pertussis antigens).**

| Ag                                       | dTap (1)<br>AJ Vaccines | dTap (3)<br>GSK        | dTpa (5)<br>Sanofi     | DTaP-IPV<br>(3)<br>GSK   | dTap-IPV<br>(3)<br>GSK | DTaP-IPV<br>(2)<br>Sanofi | dTap-IPV<br>(5)<br>Sanofi |
|------------------------------------------|-------------------------|------------------------|------------------------|--------------------------|------------------------|---------------------------|---------------------------|
| <b>Diphtheria toxoid</b>                 | not less than<br>2 IU   | not less<br>than 2 IU  | not less than<br>2 IU  | not less than<br>30 IU   | not less<br>than 2 IU  | not less than<br>30 IU    | not less than<br>2 IU     |
| <b>Tetanus toxoid</b>                    | not less than<br>20 IU  | not less<br>than 20 IU | not less than<br>20 IU | not less than<br>40 U IU | not less<br>than 20 IU | not less than<br>40 IU    | not less than<br>20 IU    |
| <b>Pertussis toxoid (PT)</b>             | 20 g                    | 8 g                    | 2,5 g                  | 25 g                     | 8 g                    | 25 g                      | 2,5 g                     |
| <b>Filamentous<br/>haemagglutinin</b>    | ---                     | 8 g                    | 5 g                    | 25 g                     | 8 g                    | 25 g                      | 5 g                       |
| <b>Pertactin</b>                         | ---                     | 2,5 g                  | 3 g                    | 8 g                      | 2,5 g                  | ---                       | 3 g                       |
| <b>Fimbriae types 2 and 3</b>            | ---                     | ---                    | 5 g                    | ---                      | ---                    | ---                       | 5 g                       |
| <b>Inactivated poliovirus<br/>type 1</b> | ---                     | ---                    | ---                    | 40 units                 | 40 units               | 40 units                  | 40 units                  |
| <b>Inactivated poliovirus<br/>type 2</b> | ---                     | ---                    | ---                    | 8 units                  | 8 units                | 8 units                   | 8 units                   |
| <b>Inactivated poliovirus<br/>type 3</b> | ---                     | ---                    | ---                    | 32 units                 | 32 units               | 32 units                  | 32 units                  |

dTap = diphtheria-tetanus-acellular pertussis vaccine with reduced antigen content; DTaP-IPV = diphtheria-tetanus-acellular pertussis-inactivated poliovirus vaccine with full antigenic content; dTap-IPV = diphtheria-tetanus-acellular pertussis vaccine with reduced antigen content combined with inactivated poliovirus vaccine.
